# Supplementary material for: Mapping Network Connectivity Among Symptoms of Depression and Pain in Wuhan Residents During the Late-Stage of the COVID-19 Pandemic
Source: Frontiers journal article supplement (doi:10.3389/fpsyt.2022.814790), 2022-03-17
Supplement: Data_Sheet_1.pdf [file Data_Sheet_1.pdf]

**Supplementary Figure 1. Bootstrapped confidence intervals of edge weights.**

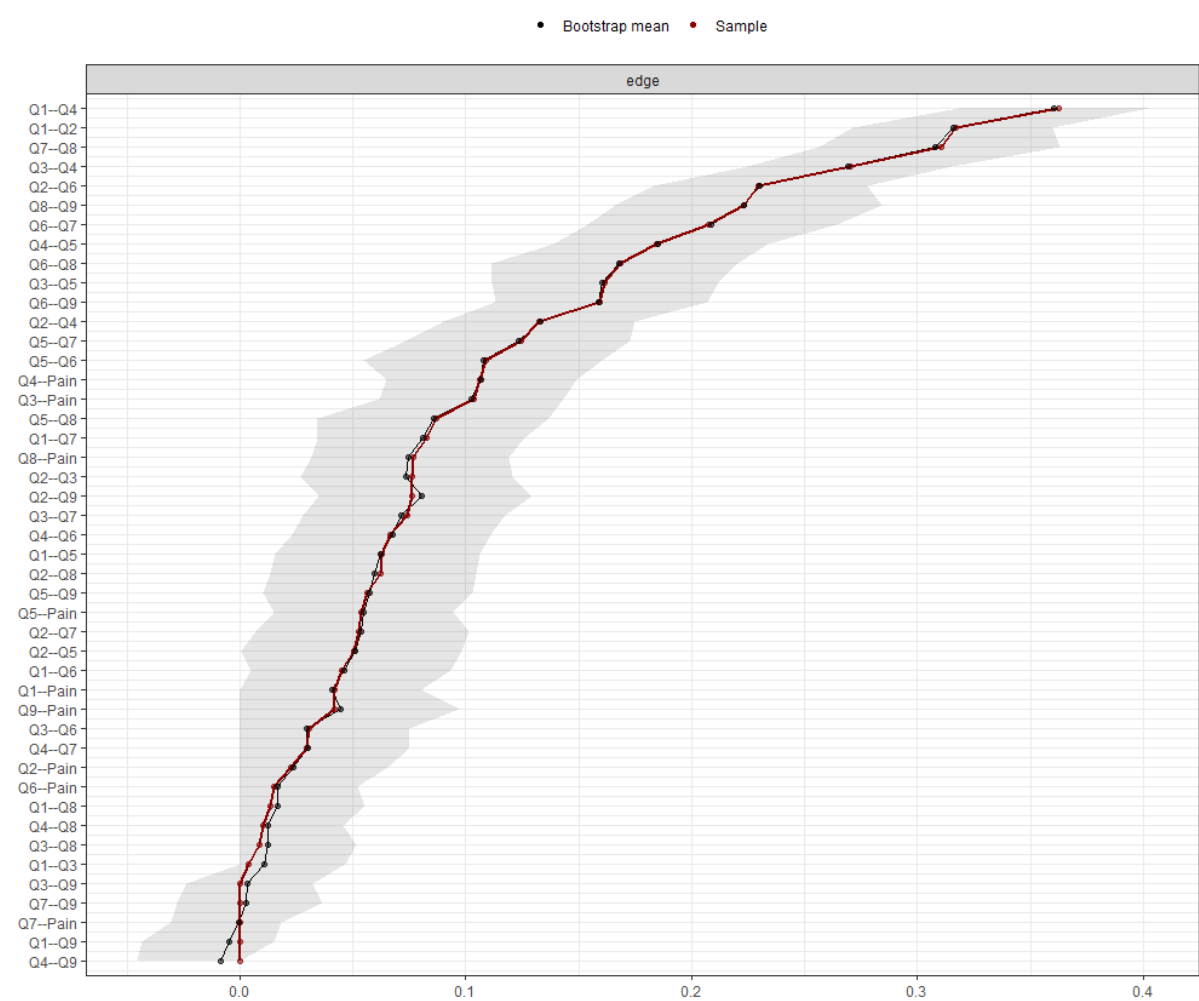

Note: The black dots indicate the values of each edge weight, ordered from the highest to the lowest value. The gray area represents the 95% confidence intervals of edge weights, estimated with the non-parametric bootstrap procedure. Wide intervals indicate lower stability and narrow intervals indicate higher stability. Q=question from the Patient Health Questionnaire.

Supplementary Figure 2. Edge weight difference by bootstrapped difference test

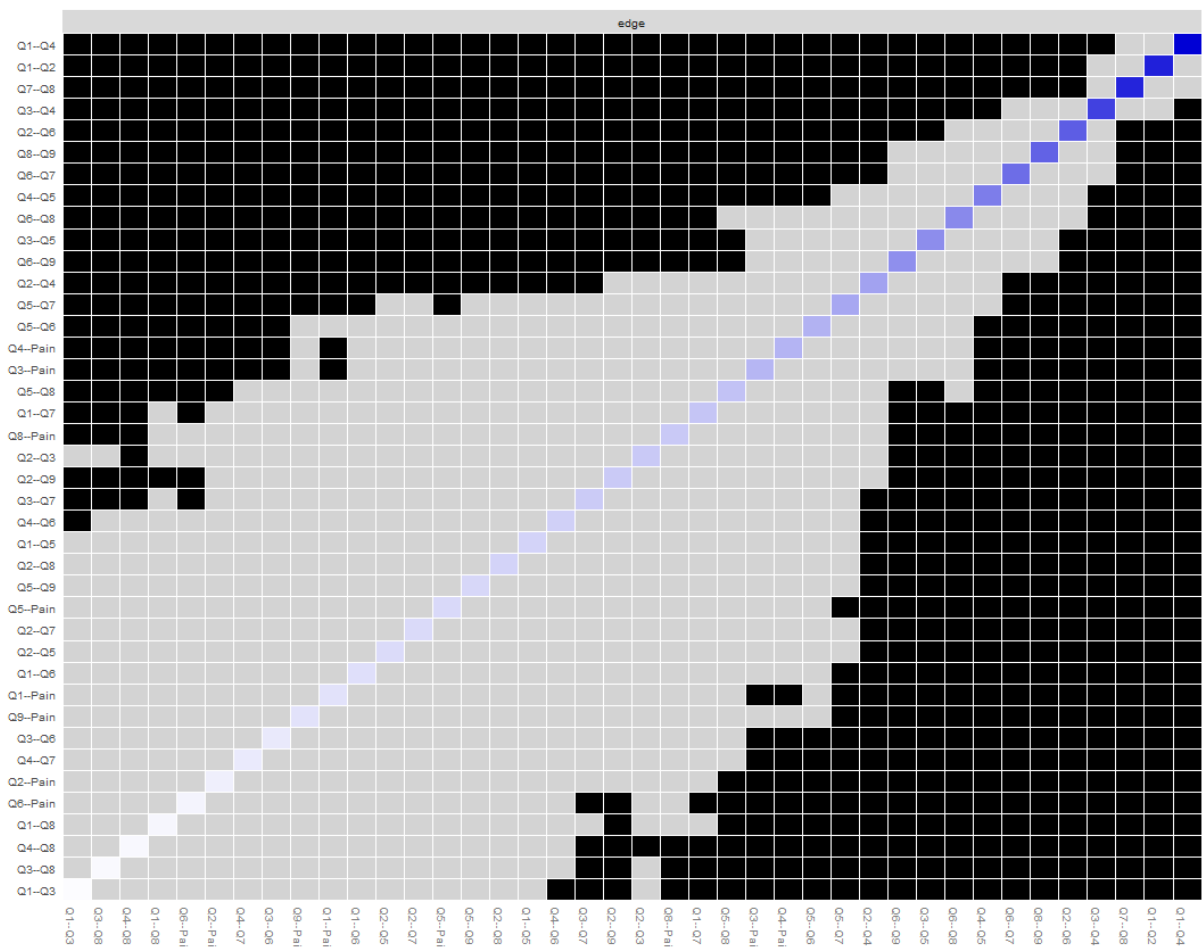

Note: Bootstrapped difference tests between edge weights in the network. Gray boxes indicate edges that do not significantly differ from one-another. Black boxes represent edges with significant difference from one another. Blue boxes in the edge-weight plot indicate positive correlations. Q=question from the Patient Health Questionnaire.

Supplementary Figure 3. Node strength difference by bootstrapped difference test.

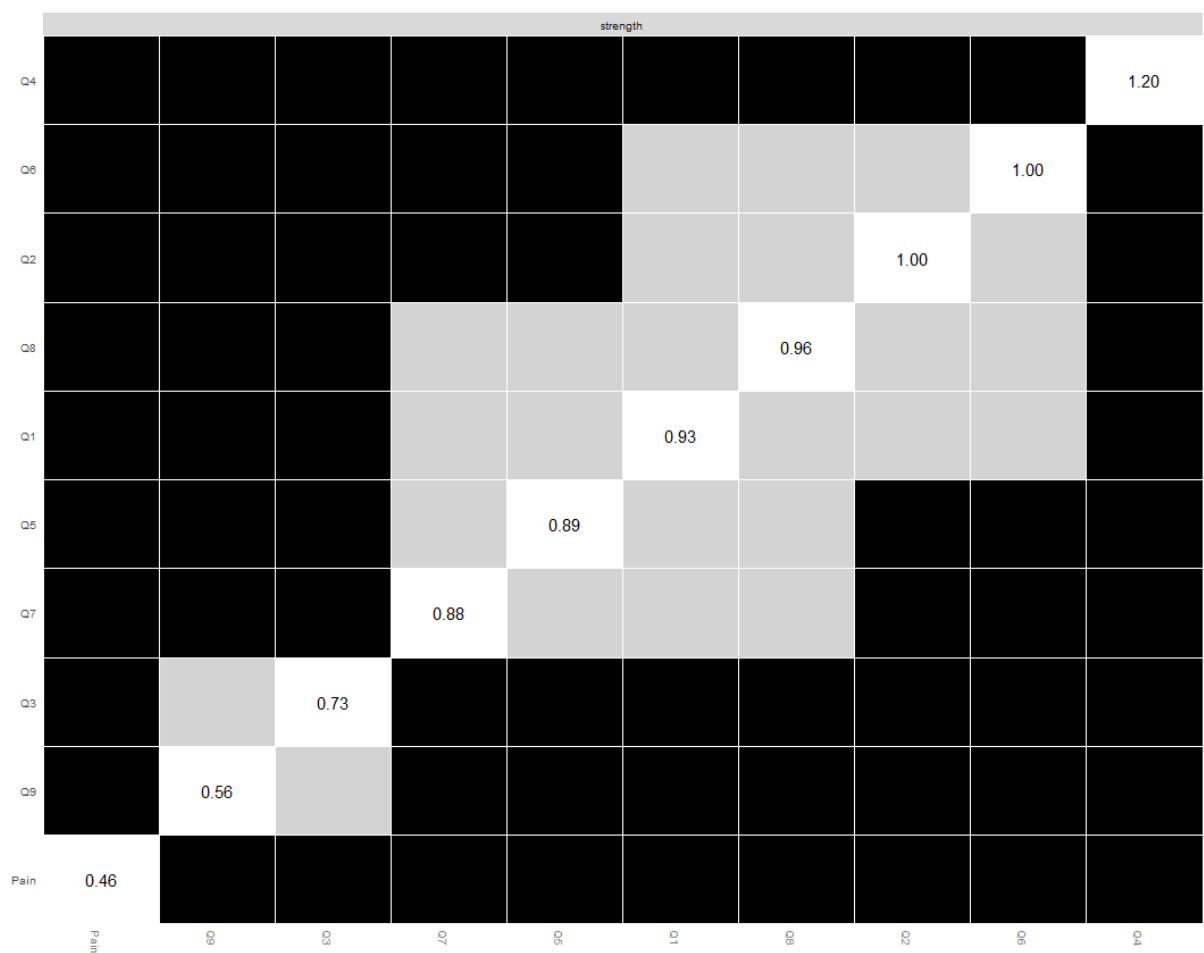

Note: Bootstrapped difference tests between node strength of factors. Gray boxes indicate nodes that do not significantly differ from one-another. Black boxes represent nodes that differ significantly from one another. White boxes show the values of node strength. Q=question from the Patient Health Questionnaire.

**Supplementary Figure 4. Estimated network of symptoms of depression and pain in males and females.**

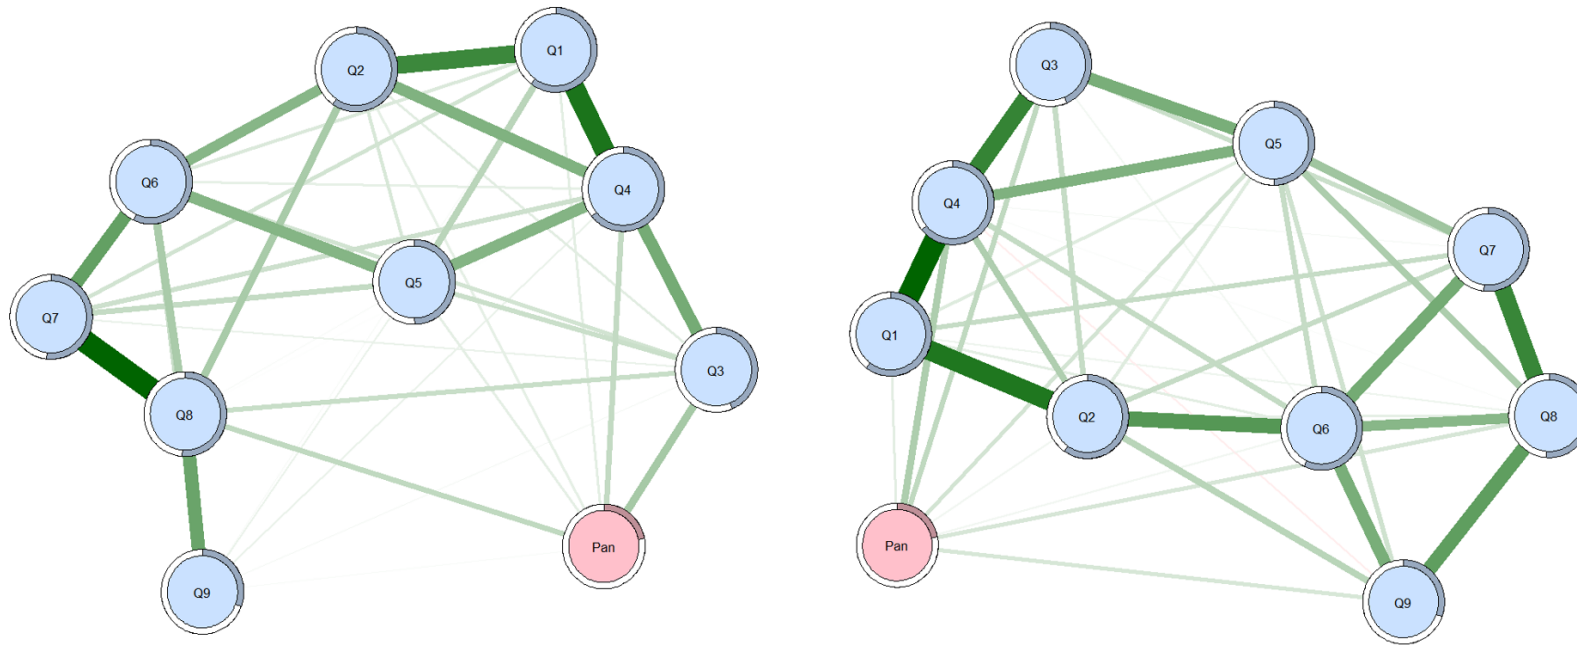

Note: left plot: female network (n=1,930); right plot: male network (n=668). In the diagram, pink node represents pain, and light blue nodes represent 9 depressive symptoms. Nodes with stronger correlations are closer to each other. The thickness of an edge indicates the strength of the correlation. Pan=pain; Q=question from the Patient Health Questionnaire; Green lines=positive associations.

**Supplementary Table 1. Edge weight matrix**

|                                                        | Q1    | Q2    | Q3    | Q4    | Q5    | Q6    | Q7    | Q8    | Q9    | Pain |
|--------------------------------------------------------|-------|-------|-------|-------|-------|-------|-------|-------|-------|------|
| <b>Q1 (Anhedonia)</b>                                  | 0     |       |       |       |       |       |       |       |       |      |
| <b>Q2 (Depressed/Sad Mood)</b>                         | 0.317 | 0     |       |       |       |       |       |       |       |      |
| <b>Q3 (Sleep)</b>                                      | 0.004 | 0.076 | 0     |       |       |       |       |       |       |      |
| <b>Q4 (Fatigue)</b>                                    | 0.362 | 0.132 | 0.270 | 0     |       |       |       |       |       |      |
| <b>Q5 (Appetite change)</b>                            | 0.063 | 0.050 | 0.162 | 0.185 | 0     |       |       |       |       |      |
| <b>Q6 (Worthlessness)</b>                              | 0.045 | 0.230 | 0.031 | 0.067 | 0.109 | 0     |       |       |       |      |
| <b>Q7 (Concentration difficulties)</b>                 | 0.082 | 0.053 | 0.074 | 0.029 | 0.124 | 0.208 | 0     |       |       |      |
| <b>Q8 (Motor)</b>                                      | 0.013 | 0.062 | 0.009 | 0.010 | 0.087 | 0.168 | 0.310 | 0     |       |      |
| <b>Q9 (Suicide/death)</b>                              | 0     | 0.076 | 0     | 0     | 0.057 | 0.159 | 0     | 0.223 | 0     |      |
| <b>Pain</b>                                            | 0.042 | 0.022 | 0.104 | 0.106 | 0.054 | 0.015 | 0     | 0.077 | 0.042 | 0    |
| Note: Q=question from the Patient Health Questionnaire |       |       |       |       |       |       |       |       |       |      |
